# Supplementary material for: Nitrogen Signaling Genes and SOC1 Determine the Flowering Time in a Reciprocal Negative Feedback Loop in Chinese Cabbage (Brassica rapa L.) Based on CRISPR/Cas9-Mediated Mutagenesis of Multiple BrSOC1 Homologs
Source: Int J Mol Sci. 2021 Apr 28;22(9):4631. doi: 10.3390/ijms22094631 (PMC8124421; doi:10.3390/ijms22094631)
Supplement: Supplementary file 1 [file ijms-22-04631-s001.zip › ijms-1174205 supplementary.v4.xlsx]

## Sheet: Table S1
Table S1. Primers used for RT-qPCR analysis.
Acc Num*	Primer sequences		Gene name
	Forward [5'-3']	Reverse [5'-3']
Bra015656	GCCGAACAATGCCAAAGAGGT	AGGGTGTGACTCGGAGGATTT	BrNIA1
Bra015227	TCCCGTCGAAACCCAGAAGA	CGGCTCGCTCTCGATCTTAAC	BrNIR1
Bra039503	GCAAGCTCCTTCCGGATGAA	TGGTCTCAGCTTCAGGAGACA	BrCIR1
Bra011002	TGTCTAAGAAGACACCATCT	TTTCTTCCGTTACCGTCG	BrTEM1
Bra030568	AACTTAGAGGATTCAATGAAGTGA	ACCATTTTCCCCAAACTTGTA	BrCRY2
Bra036517	CCTGAGAAGATCCTCTCTTCATCCT	GGTGGACCAGGTGAGTCAGC	BrPRR5
Bra001729	TGGAGAAGACGGTGGCCGAGTTTT	TTGAGGCCACGGGTTAGTCAGCTT	BrVRN1
Bra009970	TGTCATCATGGATCGCCAAACCAAT	CTTGCTTTGAAGCCAGGGTCTCGAG	BrGID1C
Bra004928	GGCATACCAAGGATCGTGTCAGC	CGGATACATTTGACACTTTTCTCA	BrSOC1-1
Bra000393	CACACCAAGGATCGAGTCAGCAG	CTAACACATTTGACACTTTTCTCG	BrSOC1-2
Bra039324	CGCATACCAAGGATCGAATCAGCA	GCATTTGACACTTTTCTCAAGTTGG	BrSOC1-3
Bra004503	AGGTGTACCAGTGGCTCAAACGCT	GCGTTTGATGCAGGCAGAGAGGTGT	BrCCA1
Bra008668	TTGCTTCCCGCCAGCAACGTGTTA	TCTGCCTCTGTCGTCTCACTCGAA	BrCOL1-2
Bra001264	TAAGAAAGATGAAACCAGTTCTGC	GGTTACTGACTGTGATGTTTGG	BrCOL9
Bra027259	TGTCAGCTTGAGACAGTGGCTGGA	AGTCGGAGCAAGAAGCGGACTCAA	BrSPA3
Bra009055	TTGAGAACAAAAGTAGCCGACAAG	CTTTCCACAAGTTCCAGTAGCTCA	BrFLC1
Bra028599	TTGAGAACAAAAGTAGCCGACAAG	AACCATACTTCGGAGCTTTTGACT	BrFLC2
Bra006051	GCTGATGATCTTAAAGCCCTGAA	AGCCAAAGCCTGATTCTCTTCTT	BrFLC3
Bra020445	ACTGGTCTAGCCAAACCAAAACTC	ACACTTCCTGCAAAAGGTATCCTC	BrVIN3A
Bra000864	TCATGATCGTCTCATCAACACAC	AGCTTTAGCTCTTTCTTGGCGTA	BrGA1
Bra035933	CCCAAGTGATCCAAATACAAACA	TGAGGTTCAGGAAGATGATTCAA	BrTOC1
Bra033291	TGGAAGGGCCTGGCAACGTATAGAA	TGCTGATGGGCCATTATTGCCAGGT	BrLHY
Bra024536	GCTTTCAGAGGCTAAGGCTGTATC	GATCCTCGAGTAGCAATGGTAGGT	BrGI
Bra022356	ATGGTGTTATGGTTGGGATGAAC	AAGAGGAGCCTCGGTAAGAAGAA	BrACT2
* Accesion Number (from each species database)

## Sheet: Table S2
Table S2. Cleaned short reads statistics after trimming of RNA sequencing data
Sample description	Raw reads	Cleaned reads	Average length	Total length (bp)
D0_4004	24598099	17837999	91.87	1638796126
	24598099	17837999	86.8	1548394361
D0_4004_2	25375998	15734146	93.65	1473551208
	25375998	15734146	86.7	1364132943
D0_4004_3	23011611	16605764	94.56	1570243971
	23011611	16605764	91.49	1519193845
D35_4004	24749290	18635739	91.49	1705043930
	24749290	18635739	88.02	1640322241
D35_4004_2	24034409	18373292	90.47	1662235236
	24034409	18373292	87.8	1613139011
D35_4004_3	25594873	18160027	93.31	1694535198
	25594873	18160027	90.53	1644045567
D0_50	27344449	19001035	92.04	1748898074
	27344449	19001035	89.95	1709231822
D0_50_2	27559937	19621403	92.1	1807227274
	27559937	19621403	90.53	1776255523
D0_50_3	21304081	12789963	94.86	1213221217
	21304081	12789963	88.37	1130234739
D35_50	30049245	21686460	92.41	2004116861
	30049245	21686460	89	1930064830
D35_50_2	27243780	19271270	91.64	1765990802
	27243780	19271270	89.62	1727105892
D35_50_3	23004460	13069033	93.14	1217270764
	23004460	13069033	90.1	1177525291
12ea	607740464	421572262	90.85	38280776726

## Sheet: Table S3
Table S3. Statistics of reads mapping to B. rapa coding sequence database
Sample ID	Total reads	Aligned 0 times		Aligned exactly 1 time		Aligned ≥ 1 times		Mapping rate
		Reads (ea)	Percent (%)	Reads (ea)	Percent (%)	Reads (ea)	Percent (%)	Reads (ea)	Percent (%)
D0_4004	17837999	4199469	0.2354	8727556	0.4893	4910974	0.2753	13638530	0.7646
	17837999	4222626	0.2367	8817748	0.4943	4797625	0.269	13615373	0.7633
D0_4004_2	15734146	4671054	0.2969	7101256	0.4513	3961836	0.2518	11063092	0.7031
	15734146	4680670	0.2975	7204350	0.4579	3849126	0.2446	11053476	0.7025
D0_4004_3	16605764	2639480	0.1589	8658318	0.5214	5307966	0.3196	13966284	0.8411
	16605764	2690157	0.162	8724756	0.5254	5190851	0.3126	13915607	0.838
D0_50	19001035	4244373	0.2234	8840321	0.4653	5916341	0.3114	14756662	0.7766
	19001035	4301058	0.2264	8840059	0.4652	5859918	0.3084	14699977	0.7736
D0_50_2	19621403	4601585	0.2345	9019111	0.4597	6000707	0.3058	15019818	0.7655
	19621403	4640687	0.2365	9020631	0.4597	5960085	0.3038	14980716	0.7635
D0_50_3	12789963	2257676	0.1765	6005017	0.4695	4527270	0.354	10532287	0.8235
	12789963	2257599	0.1765	6187797	0.4838	4344567	0.3397	10532364	0.8235
D35_4004	18635739	4099733	0.22	9000285	0.483	5535721	0.297	14536006	0.78
	18635739	4137586	0.222	9060754	0.4862	5437399	0.2918	14498153	0.778
D35_4004_2	18373292	4173187	0.2271	8885221	0.4836	5314884	0.2893	14200105	0.7729
	18373292	4214635	0.2294	8925659	0.4858	5232998	0.2848	14158657	0.7706
D35_4004_3	18160027	3246664	0.1788	8815525	0.4854	6097838	0.3358	14913363	0.8212
	18160027	3214139	0.177	8969210	0.4939	5976678	0.3291	14945888	0.823
D35_50	21686460	5130078	0.2366	10122786	0.4668	6433596	0.2967	16556382	0.7634
	21686460	5157699	0.2378	10160400	0.4685	6368361	0.2937	16528761	0.7622
D35_50_2	19271270	4813553	0.2498	8809737	0.4571	5647980	0.2931	14457717	0.7502
	19271270	4837978	0.251	8814014	0.4574	5619278	0.2916	14433292	0.749
D35_50_3	13069033	3237145	0.2477	5425990	0.4152	4405898	0.3371	9831888	0.7523
	13069033	2570354	0.1967	5867214	0.4489	4631465	0.3544	10498679	0.8033
12ea	421572262	94239185	0.2235	200003715	0.4744	127329362	0.302	327333077	0.7765
Aligned 0 times: The number of reads not mapped to reference gene sequence
Aligned exactly 1 time: The number of reads mapped to reference gene sequence exactly 1 time
Aligned 1 ≥ times: The number of reads mapped to reference gene sequence more than 1 time

## Sheet: Table S4
Table S4. BrNIA1 a nd BrNIR1 groups sequencing data
Gene ID	Symbol	Normalized read counts; Average ≥ 500												FDR; Padj < 0.05	FDR; Padj < 0.05
		D0_4004 (1)	D0_4004 (2)	D0_4004 (3)	D0_50 (1)	D0_50 (2)	D0_50 (3)	D35_4004 (1)	D035_4004 (2)	D035_4004 (3)	D35_50 (1)	D35_50 (2)	D35_50 (3)	D0_4004 vs D0_50	D35_4004 vs D35_50
Bra003670	NIA1	944	504	188	2720	2202	2535	557	954	658	4156	4055	2953	1.45408e-10	5.85195e-13
Bra008333	NIA1	766	414	159	2557	2073	2391	490	808	571	3233	2880	2642	2.00088e-12	2.28755e-11
Bra015227	NIR1	923	570	458	3204	2562	2129	585	649	856	3025	2491	4449	1.12313e-09	1.39845e-10
Bra015656	NIA1	2005	1021	499	7727	6171	6980	1221	1938	1540	7154	6281	7311	2.7749e-14	2.92459e-10
Bra039844	NIR1	789	585	634	5852	4379	2986	580	597	947	2404	2063	4676	7.64821e-12	4.2501e-06

## Sheet: Table S5
Table S5. Flowering time (Ft) specific DEG RNA sequencing data
Gene ID	Symbol	Full name	Enhancer / Repressor	Normalized read counts; Average ≥ 500												FDR; Padj < 0.05
				D0_4004 (1)	D0_4004 (2)	D0_4004 (3)	D0_50 (1)	D0_50 (2)	D0_50 (3)	D35_4004 (1)	D035_4004 (2)	D035_4004 (3)	D35_50 (1)	D35_50 (2)	D35_50 (3)	D35_4004 vs D0_4004	D35_50 vs D0_50	D0_4004 vs D0_50	D35_4004 vs D35_50
Bra004503	CCA1	CIRCADIAN CLOCK ASSOCIATED 1	Repressor	255	249	400	97	96	116	1647	1721	1460	1308	1203	962	4.41154e-13	2.41786e-24	*	*
Bra039503	CIR1	CIRCADIAN 1	Repressor	98	38	9	31	41	11	212	399	85	959	959	365	*	1.64534e-11	*	0.0210154
Bra008668	COL1-2	CONSTANS-LIKE 1-2	Enhancer	116	37	113	26	45	32	304	561	445	664	652	747	*	3.65974e-31	*	*
Bra002709	COL5	CONSTANS-LIKE 5	Enhancer	645	464	698	1142	817	1081	1786	1917	2900	3254	3673	6091	4.41154e-13	4.61637e-08	*	*
Bra020425	COL5	CONSTANS-LIKE 5	Enhancer	827	612	1037	1511	1172	1938	1866	2051	3794	4025	4297	6960	1.00551e-05	3.43869e-06	*	*
Bra001264	COL9	CONSTANS-LIKE 9	Repressor	191	200	79	48	58	30	559	606	313	679	675	300	*	8.91508e-19	*	*
Bra040020	COL9	CONSTANS-LIKE 9	Repressor	350	329	118	57	58	23	749	768	384	795	806	318	0.00740495	7.49095e-18	*	*
Bra015313	CRY2	CRYPTOCHROME 2	Enhancer	2643	2524	2591	438	453	463	2740	2958	2747	692	664	684	*	*	5.74346e-14	3.51565e-09
Bra030568	CRY2	CRYPTOCHROME 2	Enhancer	3156	2788	2679	1319	1344	1129	3209	3553	2651	1992	2029	1464	*	*	0.00112683	*
Bra038832	FKF1	FLAVIN-BINDING, KELCH REPEAT, F BOX 1	Enhancer	1650	1638	1203	767	852	1115	2706	3085	3097	1980	1756	2385	*	0.00137114	*	*
Bra009055	FLC1	FLOWERING LOCUS C1	Repressor	553	634	868	934	789	1225	34	31	48	96	101	93	2.9343e-32	2.15142e-20	*	*
Bra028599	FLC2	FLOWERING LOCUS C2	Repressor	1044	1151	1976	1081	1018	1572	72	83	108	109	123	136	1.93086e-25	3.04908e-17	*	*
Bra006051	FLC3	FLOWERING LOCUS C3	Repressor	1237	1386	2539	1177	1164	1977	63	90	100	52	60	62	1.48214e-19	1.08713e-19	*	*
Bra000864	GA1	GA REQUIRING 1	Enhancer	75	76	19	23	58	33	693	831	261	181	454	191	2.98823e-07	*	*	*
Bra024536	GI	GIGANTEA	Enhancer	3591	2920	2883	2409	2516	3146	6753	6855	6278	4643	4773	5253	0.00395173	*	*	*
Bra009970	GID1C	GA INSENSITIVE DWARF 1C	Enhancer	790	852	1006	346	379	462	634	672	714	609	670	968	*	*	0.000963137	*
Bra030496	LHY	LATE ELONGATED HYPOCOTYL	Repressor	31	29	26	24	15	11	1208	1142	1046	1001	866	507	2.09264e-46	1.70207e-46	*	*
Bra033291	LHY	LATE ELONGATED HYPOCOTYL	Repressor	40	40	50	26	39	14	1427	1396	1459	1353	1250	831	1.06912e-43	1.6068e-45	*	*
Bra018204	LUX/PCL1	LUX ARRHYTHMO / PHYTOCLOCK 1	Repressor	85	75	102	53	58	119	290	299	597	289	342	978	*	0.000471443	*	*
Bra033809	LUX/PCL1	LUX ARRHYTHMO / PHYTOCLOCK 1	Repressor	289	281	314	170	201	338	323	332	649	389	472	981	*	0.00653336	*	*
Bra018589	NF-YC9	NUCLEAR FACTOR Y, SUBUNIT C9	Enhancer	231	272	477	175	116	350	290	258	563	404	404	754	*	0.00215259	*	*
Bra020013	PHYA	PHYTOCHROME A	Enhancer	1302	1009	859	1086	893	521	2137	2787	1593	2204	2268	1571	0.00575277	0.000609188	*	*
Bra031672	PHYA	PHYTOCHROME A	Enhancer	500	372	302	465	353	220	828	1107	621	781	798	547	0.0027606	0.00855807	*	*
Bra020017	PIF3	PHYTOCHROME INTERACTING FACTOR 3	Repressor	568	354	330	354	241	215	832	797	705	681	757	829	*	9.41689e-05	*	*
Bra009768	PRR5	PSEUDO-RESPONSE REGULATOR 5	Enhancer	2503	2422	1961	1475	1684	2115	4687	5253	4250	2812	2606	3002	0.00532809	*	*	*
Bra036517	PRR5	PSEUDO-RESPONSE REGULATOR 5	Enhancer	1202	1237	891	698	805	676	2806	3128	2112	1188	1111	806	0.000324728	*	*	0.00043737
Bra019821	RAV1	RELATED TO ABI3/VP1 1	Repressor	824	675	1307	427	307	588	1051	1192	1573	1012	938	1891	*	2.60404e-05	0.00117409	*
Bra026917	RAV1	RELATED TO ABI3/VP1 1	Repressor	935	759	1356	622	421	715	1017	1174	1617	1265	1200	2476	*	8.13105e-05	*	*
Bra000393	SOC1	SUPPRESSOR OF OVEREXPRESSION OF CO 1	Enhancer	55	62	24	4	4	3	798	579	371	259	277	45	9.45592e-11	*	*	0.046652
Bra004928	SOC1	SUPPRESSOR OF OVEREXPRESSION OF CO 1	Enhancer	71	70	31	6	4	4	1011	752	484	337	361	53	1.6375e-11	*	*	0.043371
Bra039324	SOC1	SUPPRESSOR OF OVEREXPRESSION OF CO 1	Enhancer	78	83	37	7	4	4	986	716	461	282	306	47	4.12387e-10	*	*	0.0162686
Bra027259	SPA3	SUPPRESSOR OF PHYA 1(SPA1)-RELATED 3	Repressor	388	326	179	244	232	94	897	1030	362	623	587	169	0.0102448	*	*	*
Bra011002	TEM1	TEMPRANILLO 1	Repressor	2078	1822	3343	759	831	712	780	1195	1151	764	718	1280	0.000770234	*	1.93212e-06	*
Bra012964	TOC1	TIMING OF CAB EXPRESSION 1	Repressor	1339	1215	861	1489	1451	1469	3782	3852	4472	4191	4165	5860	9.21993e-08	2.99019e-06	*	*
Bra035933	TOC1	TIMING OF CAB EXPRESSION 1	Repressor	1561	1491	1277	1643	1591	1403	2711	2950	3160	2839	2819	3364	0.00736179	*	*	*
Bra000487	TOE1	TARGET OF EARLY ACTIVATION TAGGED 1	Repressor	348	322	475	260	254	414	534	508	768	606	589	1245	*	0.000673474	*	*
Bra015390	UBC1	UBIQUITIN CARRIER PROTEIN 1	Repressor	288	299	277	341	314	116	676	622	648	759	804	321	0.001659	0.00046222	*	*
Bra016703	UBC1	UBIQUITIN CARRIER PROTEIN 1	Repressor	1212	1216	1339	1340	1181	1257	2589	2618	2737	2959	3150	2830	0.00399784	0.000528156	*	*
Bra016704	UBC1	UBIQUITIN CARRIER PROTEIN 1	Repressor	449	433	477	524	443	437	1048	1083	1118	1275	1389	1328	0.000533381	2.74705e-05	*	*
Bra026222	UBC1	UBIQUITIN CARRIER PROTEIN 1	Repressor	907	895	889	1023	878	839	1920	1943	1881	2155	2266	1761	0.00332419	0.00113126	*	*
Bra026833	UBC1	UBIQUITIN CARRIER PROTEIN 1	Repressor	967	978	1083	962	881	865	2128	2155	2264	2224	2315	2019	0.00274725	0.00215259	*	*
Bra020445	VIN3A	VERNALIZATION INSENSITIVE 3A	Enhancer	157	131	180	136	104	90	963	1155	881	602	603	448	2.17135e-15	2.20627e-11	*	*
Bra001729	VRN1	REDUCED VERNALIZATION RESPONSE 1	Enhancer	2003	3923	1642	946	613	677	413	487	444	447	354	805	9.3624e-06	*	0.00283826	*
* : Not included as DEG
Full name and enhancer or repressor of Ft genes are analyzed using FLOR-ID (https://www.phytosystems.ulg.ac.be/florid/)

## Sheet: Table S6
Table S6. B36-1 backcrossing (BC) T1 plants NGS sequencing results
	Plant number	BrSOC1-1 (Bra004928)	BrSOC1-2 (Bra000393)	BrSOC1-3 (Bra039324)
B36-1 #9_BC T1	1	+1bp (50%)	+1bp (52%)	+1bp (48%)
	2	+1bp (50%)	+1bp (48%)	+1bp (48%)
	6	+1bp (51%)	+1bp (35%)	+1bp (51%)
	8	*	*	+1bp (50%)
*: Not investigated

## Sheet: Table S7
Table S7. B36-1 backcrossing (BC) T2 plants NGS sequencing results
	Plant number	BrSOC1-1 (Bra004928)	BrSOC1-2 (Bra000393)	BrSOC1-3 (Bra039324)
B36-1 #9_BC T2	1	-	+1bp (99.1%)	+1bp (50%)
	2	+1bp (98.4%)	-	+1bp (99.5%)
	3	-	+1bp (90.3%)	-
	4	-	-	+1bp (51%)
	5	+1bp (48%)	+1bp (47.8%)	+1bp (99.6%)
	6	+1bp (48.3%)	+1bp (99.2%)	-
	7	-	+1bp (49.9%)	+1bp (49.9%)
	8	-	+1bp (48.4%)	-
	9	+1bp (49.4%)	+1bp (98.8%)	+1bp (50.1%)
	10	+1bp (48.7%)	-	+1bp (50.5%)
	11	-	+1bp (99.1%)	-
	12	-	+1bp (99.1%)	-
	13	-	+1bp (99.1%)	+1bp (50.1%)
	14	+1bp (48.6%)	+1bp (99.2%)	-
	15	+1bp (48.2%)	+1bp (50.5%)	-
	16	+1bp (49.4%)	+1bp (47.5%)	+1bp (50.3%)
	17	+1bp (48.4%)	+1bp (47.4%)	-
	18	+1bp (98.2%)	-	-
	19	+1bp (48.4%)	+1bp (49%)	-
	20	+1bp (49.1%)	+1bp (47.2%)	+1bp (50.5%)
	21	-	+1bp (47.6%)	+1bp (99.6%)
	22	-	+1bp (99%)	+1bp (49.5%)
	23	+1bp (48.9%)	-	+1bp (49.3%)
	24	-	+1bp (99.1%)	+1bp (49.5%)
	25	+1bp (98.2%)	-	+1bp (49.4%)
	26	+1bp (98%)	+1bp (47.5%)	+1bp (50.4%)
	27	-	+1bp (48.2%)	+1bp (48.7%)
	28	+1bp (48.8%)	+1bp (47.9%)	+1bp (99.6%)
	29	+1bp (48.5%)	+1bp (99.1%)	-
	30	-	+1bp (49.3%)	+1bp (99.6%)
	31	+1bp (98.8%)	+1bp (50.2%)	+1bp (99.5%)
	32	+1bp (49.2%)	+1bp (99%)	+1bp (99.6%)
	33	+1bp (98.3%)	+1bp (47.8%)	+1bp (99.7%)
	34	+1bp (48.8%)	+1bp (48%)	+1bp (50.3%)
	35	-	+1bp (48%)	+1bp (50.4%)
	36	+1bp (48.3%)	+1bp (46.5%)	+1bp (99.4%)
	37	+1bp (48.9%)	+1bp (55.4%)	-
	38	-	+1bp (99%)	+1bp (50.1%)
	39	+1bp (98.2%)	+1bp (99.1%)	+1bp (50.3%)
	40	-	+1bp (49.4%)	+1bp (99.3%)
	41	-	-	+1bp (49.6%)
	42	+1bp (48.3%)	-	+1bp (50.3%)
	43	-	+1bp (99%)	+1bp (99%)
	44	+1bp (47.9%)	+1bp (98.8%)	+1bp (98.9%)
	45	+1bp (49.1%)	-	+1bp (49.6%)
	46	+1bp (48.7%)	-	+1bp (99.7%)
	47	-	+1bp (47.3%)	+1bp (49.4%)
	48	+1bp (49.1%)	+1bp (50%)	+1bp (49%)
	49	+1bp (48.8%)	-	-
	50	+1bp (99.7%)	+1bp (50.2%)	-
	51	+1bp (48.8%)	+1bp (48.6%)	+1bp (49.1%)
	52	-	+1bp (99.8%)	-
	53	+1bp (47.7%)	+1bp (99.8%)	+1bp (47.9%)
	54	-	+1bp (49.7%)	+1bp (99.8%)
	55	-	+1bp (99.7%)	+1bp (48.5%)
	56	+1bp (50.6%)	+1bp (49.3%)	+1bp (49.9%)
	57	+1bp (49.7%)	+1bp (49.3%)	+1bp (50.2%)
	58	+1bp (49.5%)	-	-
	59	+1bp (49.7%)	+1bp (99.9%)	-
	60	-	+1bp (50%)	+1bp (49.6%)
	61	+1bp (50.3%)	+1bp (49.9%)	+1bp (49.5%)
	62	+1bp (99.8%)	+1bp (50.5%)	+1bp (49.6%)
	63	+1bp (95.3%)	+1bp (49.4%)	+1bp (50.1%)
	64	+1bp (99.8%)	-	+1bp (50.3%)
	65	-	+1bp (99.3%)	+1bp (99.5%)
	66	+1bp (99.8%)	+1bp (49.4%)	-
	67	+1bp (49.5%)	-	+1bp (50.1%)
	68	+1bp (49.3%)	-	-
	69	+1bp (50.6%)	-	+1bp (49.5%)
	70	+1bp (48.9%)	-	-
	71	+1bp (48.5%)	+1bp (99.8%)	-
	72	+1bp (48.9%)	+1bp (50.1%)	+1bp (51.9%)
	73	-	+1bp (49.7%)	+1bp (51%)
	74	+1bp (48.7%)	+1bp (48.7%)	+1bp (49.8%)
	75	+1bp (99.2%)	+1bp (98.2%)	+1bp (49.9%)
	76	+1bp (49.5%)	-	-
	77	+1bp (49.5%)	+1bp (50.4%)	+1bp (99.8%)
	78	+1bp (48.5%)	-	+1bp (99.9%)
	79	+1bp (99.7%)	+1bp (99.5%)	+1bp (49.1%)
	80	+1bp (51%)	+1bp (49.2%)	-
	81	+1bp (50.4%)	+1bp (51.3%)	+1bp (49.8%)
	82	+1bp (49.2%)	-	+1bp (39.3%)
	83	+1bp (48.6%)	+1bp (99.7%)	+1bp (67.5%)
	84	-	+1bp (99.9%)	+1bp (51.7%)
	85	+1bp (49.4%)	+1bp (49.8%)	-
-: Indel frequency is lower than 5% of total reads; narrow to wild type (WT)
