# Supplementary material for: Nitrogen Signaling Genes and SOC1 Determine the Flowering Time in a Reciprocal Negative Feedback Loop in Chinese Cabbage (Brassica rapa L.) Based on CRISPR/Cas9-Mediated Mutagenesis of Multiple BrSOC1 Homologs
Source: Int J Mol Sci. 2021 Apr 28;22(9):4631. doi: 10.3390/ijms22094631 (PMC8124421; doi:10.3390/ijms22094631)
Supplement: Supplementary file 1 [file ijms-22-04631-s001.zip › ijms-1174205 supplementary.v7.pdf]

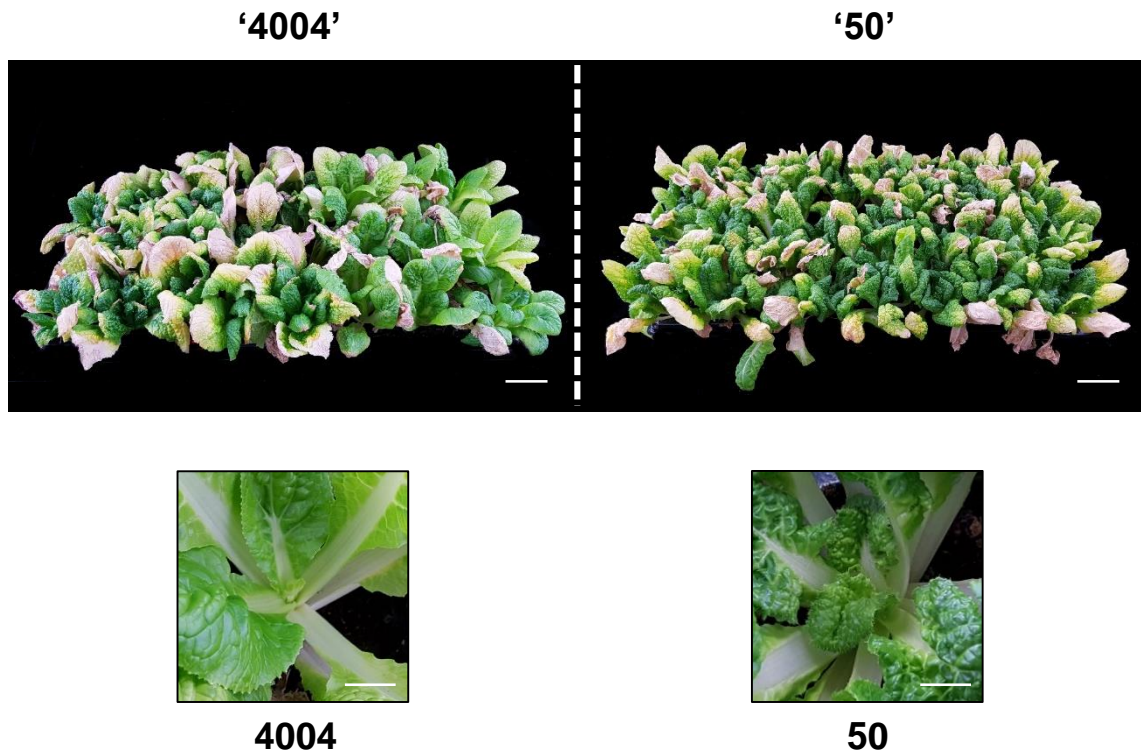

**Figure S1.** Bolting phenotypes of two Chinese cabbage inbred lines without vernalization. Germinated seedlings were grown in a growth room (23 °C, 16 h light/8 h dark) for 12 weeks without switching to vernalization conditions. Upper pictures, scale bars = 5 cm; lower pictures, scale bars = 1 cm.

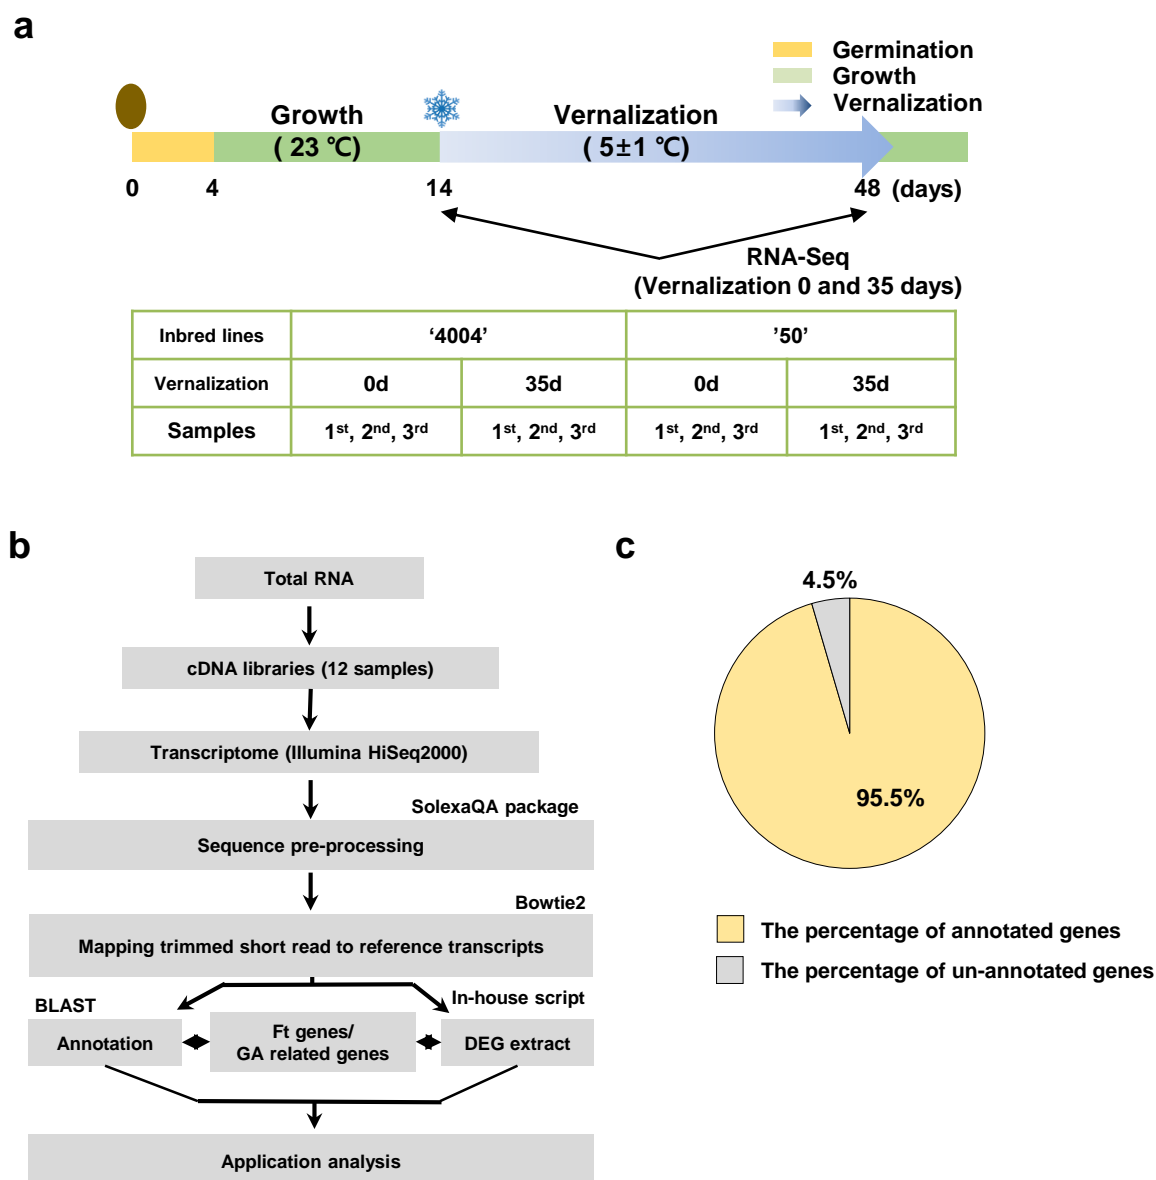

**Figure S2.** Experimental design for RNA-seq analysis. **(a, b)** Samples of line '4004' and line '50' plants were subjected to vernalization for 0 and 35 days and used for RNA-seq analysis. 0d, 0 days vernalization; 35d, 35 days vernalization; 1<sup>st</sup>, 2<sup>nd</sup>, 3<sup>rd</sup>, independent biological triplicates. Schematic presentation of the workflow and algorithm used to detect DEGs and flowering-time genes. **(c)** Annotation statistics analysis. Genes were analyzed using the B. rapa functional annotation set; Brapa\_sequence\_v1.5\_CDS.

a

0D Ver, up-regulated in 50

| Go IDs     | Go terms                                        | Gene counts | Ft genes |
|------------|-------------------------------------------------|-------------|----------|
| GO:0006807 | Nitrogen compound metabolic process             | 449         | 0        |
| GO:0044271 | Cellular nitrogen compound biosynthetic process | 339         | 0        |
| GO:0019740 | Nitrogen utilization                            | 5           | 0        |
| GO:0042126 | Nitrate metabolic process                       | 6           | 0        |
| GO:2001057 | Reactive nitrogen species metabolic process     | 6           | 0        |
| GO:1901698 | Response to nitrogen compound                   | 46          | 0        |
| GO:1905392 | Plant organ morphogenesis                       | 79          | 0        |
| GO:0048438 | Floral whorl development                        | 43          | 0        |
| GO:0009791 | Post-embryonic development                      | 130         | 0        |
| GO:0048437 | Floral organ development                        | 43          | 0        |
| GO:0061458 | Reproductive system development                 | 86          | 0        |

35D Ver, up-regulated in 50

| Go IDs     | Go terms                                    | Gene counts | Ft genes |
|------------|---------------------------------------------|-------------|----------|
| GO:0042126 | Nitrate metabolic process                   | 5           | 0        |
| GO:2001057 | Reactive nitrogen species metabolic process | 5           | 0        |
| GO:0006809 | Nitric oxide biosynthetic process           | 3           | 0        |
| GO:0046209 | Nitric oxide metabolic process              | 3           | 0        |
| GO:0006807 | Nitrogen compound metabolic process         | 110         | 0        |
| GO:0008940 | Nitrate reductase activity                  | 3           | 0        |
| GO:0098809 | Nitrite reductase activity                  | 2           | 0        |
| GO:0048509 | Regulation of meristem development          | 7           | 0        |

b

0D Ver, up-regulated in 4004

| Go IDs     | Go terms                           | Gene counts | Ft genes |
|------------|------------------------------------|-------------|----------|
| GO:0006950 | Response to stress                 | 284         | 5        |
| GO:0050896 | Response to stimulus               | 384         | 6        |
| GO:0009628 | Response to abiotic stimulus       | 192         | 5        |
| GO:0009725 | Response to hormone                | 157         | 4        |
| GO:0009409 | Response to cold                   | 62          | 1        |
| GO:0048583 | Regulation of response to stimulus | 74          | 2        |
| GO:0009631 | Cold acclimation                   | 7           | 0        |
| GO:0048281 | Inflorescence morphogenesis        | 4           | 0        |
| GO:0010150 | Leaf senescence                    | 13          | 0        |
| GO:0090693 | Plant organ senescence             | 13          | 0        |
| GO:0010229 | Inflorescence development          | 4           | 0        |

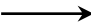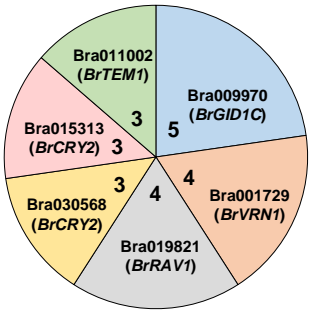

**Figure S3.** Identification of flowering time (Ft) genes based on gene ontology (GO) terms. **(a)** Detection of Ft genes among up-regulated DEGs in line '4004', 0D Ver conditions (left Table); 35D Ver conditions (right Table). **(b)** Detection of Ft genes among up-regulated DEGs in line '50' under 0D Ver conditions.

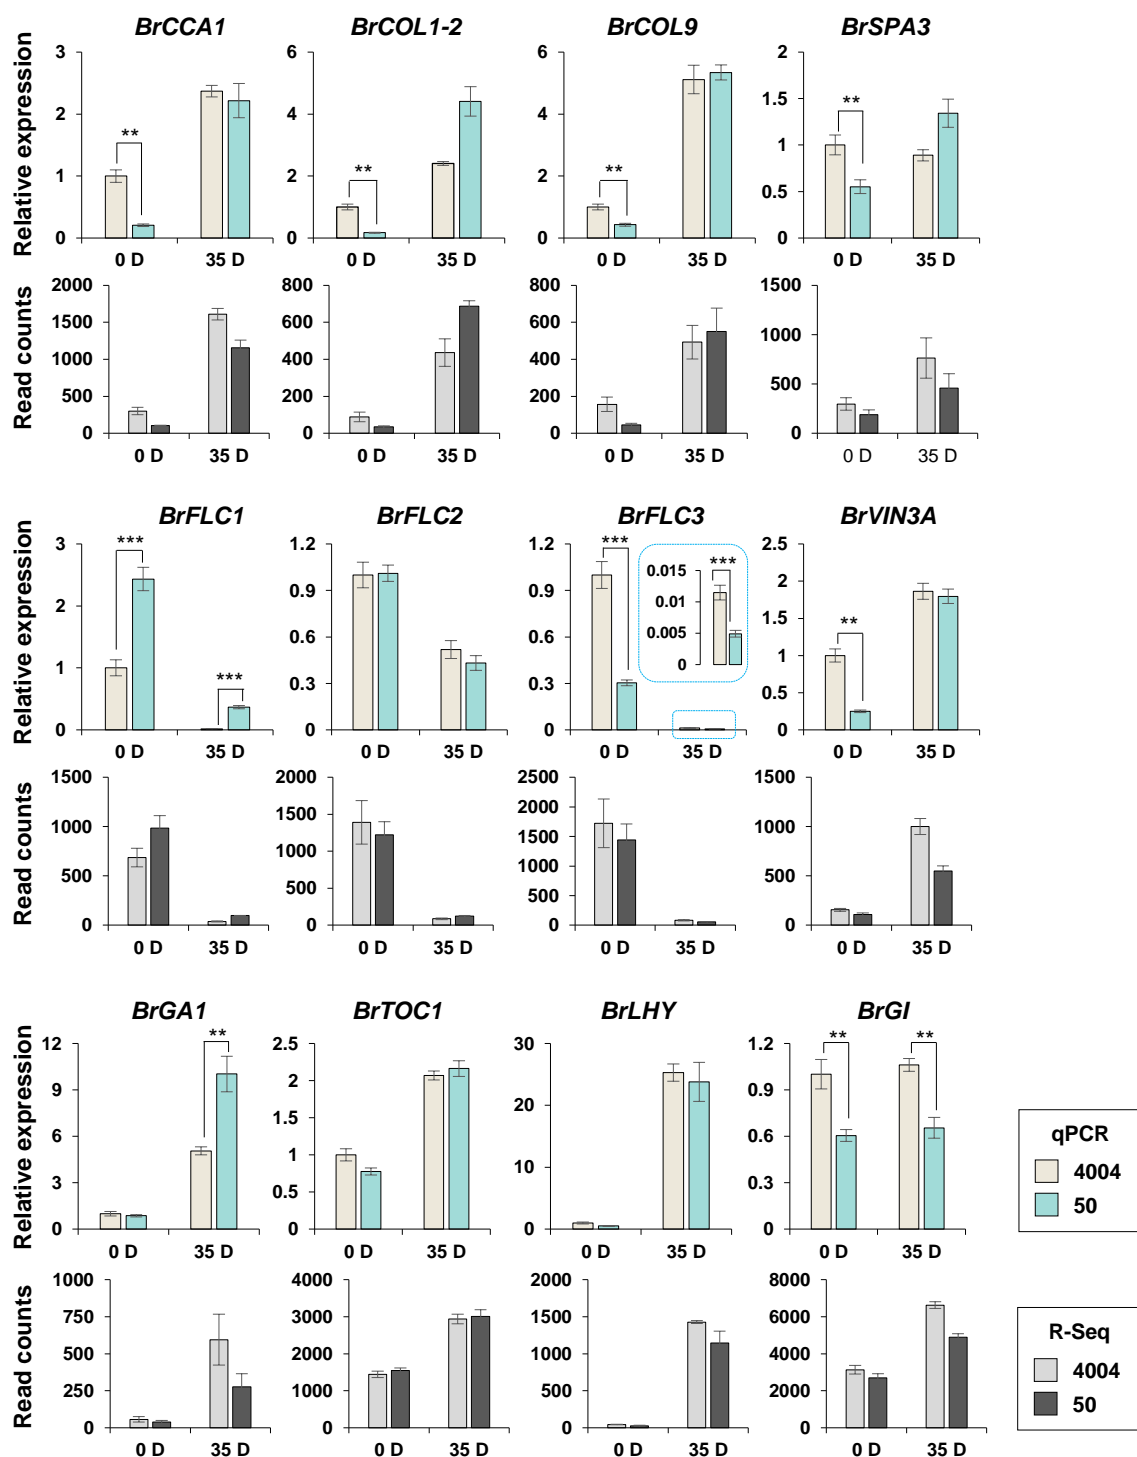

**Figure S4.** Results of qPCR and RNA-seq analysis of flowering time (Ft)-related genes in the inbred lines '4004' and '50' grown with or without vernalization. This analysis was done in the same leaf samples (+/- Vernalization) used for RNAseq. qPCR values were normalized against the corresponding level of internal control gene actin (*BrACT2*). For each gene in the qPCR analysis, the expression level from '4004' on day 0 was defined as "1". Error bars represent  $\pm$  SE of three replicates (\*\* $p < 0.05$ , \*\*\*  $p < 0.01$ ; Student's t-test).

|                 |             |                                                        |
|-----------------|-------------|--------------------------------------------------------|
| <b>BrSOC1-1</b> | Bra004928   | TC <b>TCTGATCATCTTCTCTC</b> -CTA <b>AGG</b> CAAACTTTAT |
|                 | Indel (+ C) | TC <b>TCTGATCATCTTCTCTC</b> CC <b>TA</b> AGGCAAACTTTAT |
|                 |             | S L I I F S P K A K L Y                                |
|                 |             | S L I I F S P *                                        |
| <b>BrSOC1-2</b> | Bra000393   | TC <b>TCTGATCATCTTCTCTC</b> -CTA <b>AGG</b> GAAACTTTAT |
|                 | Indel (- C) | TC <b>TCTGATCATCTTCTCT</b> --CTA <b>AGG</b> GAAACTTTAT |
|                 | Indel (+ A) | TC <b>TCTGATCATCTTCTCTC</b> ACTA <b>AGG</b> GAAACTTTAT |
|                 |             | S L I I F S P K G K L Y                                |
|                 |             | S L I I F S <b>L R E N F</b>                           |
|                 |             | S L I I F S H *                                        |
| <b>BrSOC1-3</b> | Bra039324   | TC <b>TCTGATCATCTTCTCTC</b> -CTA <b>AGG</b> GAAACTTTA  |
|                 | Indel (+ A) | TC <b>TCTGATCATCTTCTCTC</b> ACTA <b>AGG</b> GAAACTTTA  |
|                 |             | S L I I F S P K G K T L                                |
|                 |             | S L I I F S H *                                        |

**Figure S5.** Multiple sequence alignment of insertion/deletion (indel) variants of three BrSOC1 homologs.

**B36-1 #9 T<sub>2</sub>**

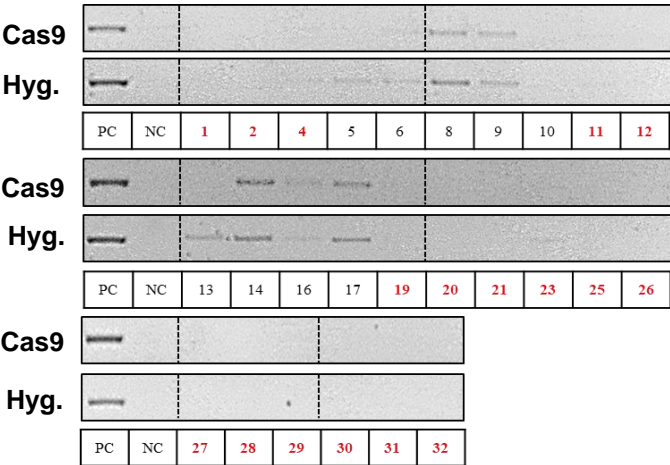

**B36-1 #18 T<sub>2</sub>**

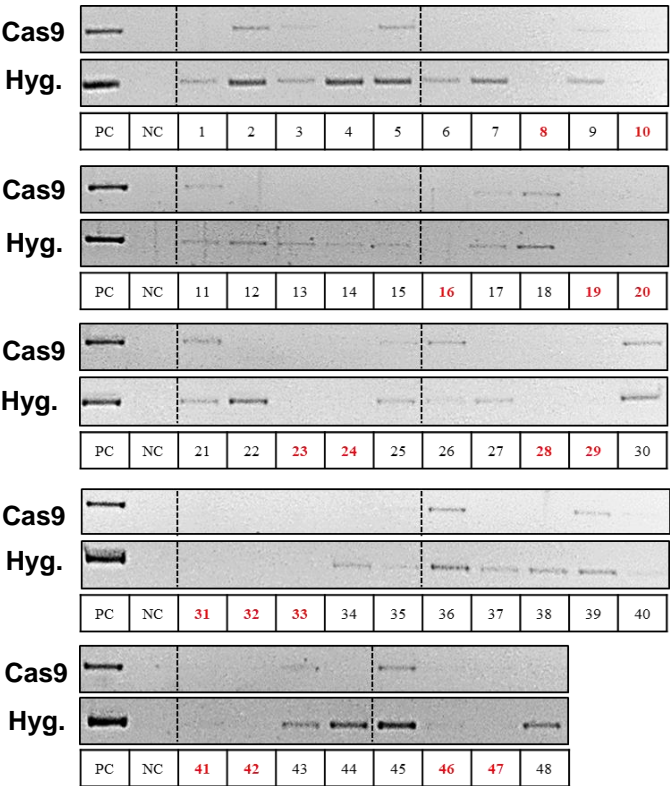

**Figure S6.** Cas9 and Hygromycin (Hyg.) PCR analysis in B36-1 T<sub>2</sub> plants. PC, positive control (pHAtC vector); NC, negative control ('20' WT). Red numbers mean deletion of Cas9 and Hyg.

**a**

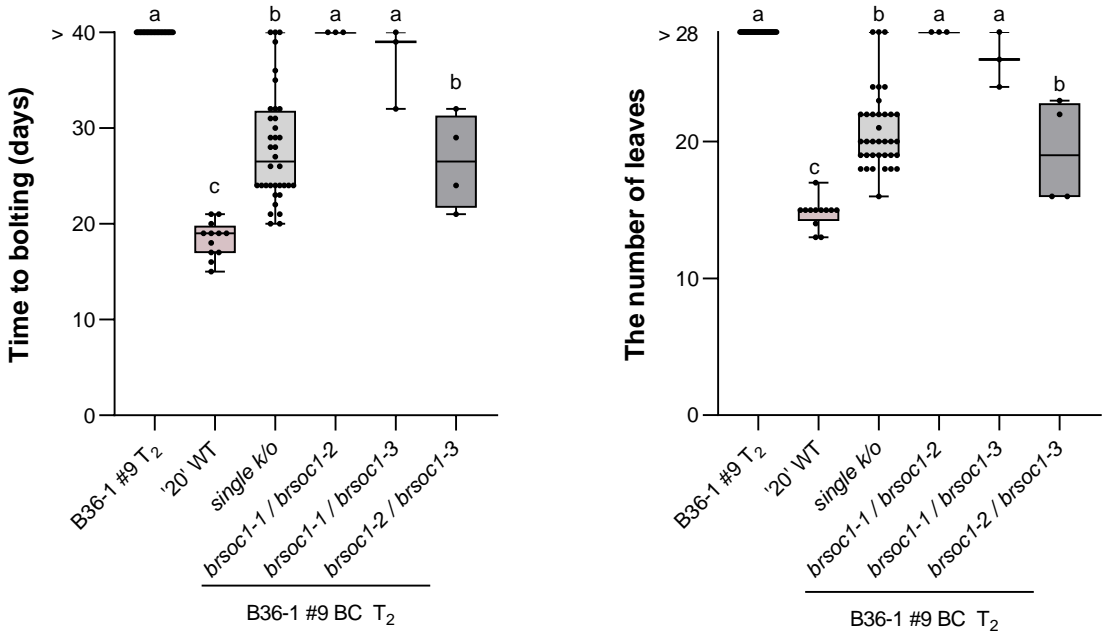

**b**

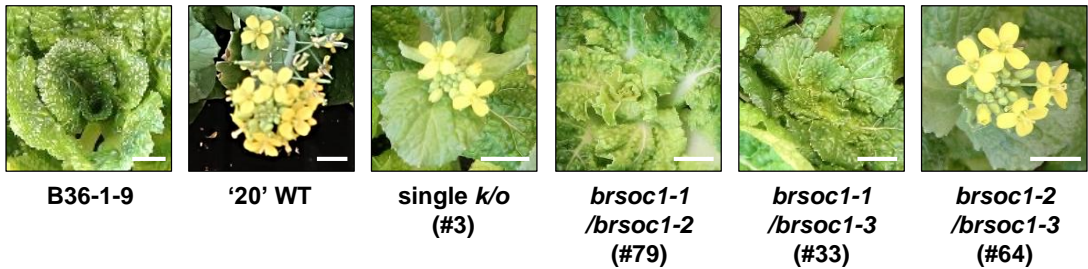

**Figure S7.** Backcrossing (BC) of *brsocc1s* gene-edited Chinese cabbage. **(a)** Statistical analysis of the number of days to bolting after vernalization, and the number of leaves in the six genotypic groups. The leaves were counted when the plants started bolting. Statistically significant differences are indicated with different letters ( $p < 0.05$ , one-way ANOVA followed by Tukey post-hoc test, each dot indicates the number of plants ( $n$ ); B36-1 #9 T<sub>2</sub> = 32, '20' WT = 12, single *k/o* (*brsocc1-1*, *brsocc1-2* or *brsocc1-3*) = 36, double *k/o*; *brsocc1-1*/*brsocc1-2* = 3, *brsocc1-1*/*brsocc1-3* = 3, *brsocc1-2*/*brsocc1-3* = 4). **(b)** Bolting phenotype between B36-1-9, WT '20', and B36-1 BC T<sub>2</sub> plants (selfing after backcrossing). Seedlings were vernalized for 35 days at  $5 \pm 1$  °C using the 16 h light / 8 h dark photoperiod and then transferred to a growth room at 23 °C for more than 40 days. Scale bars = 1 cm.

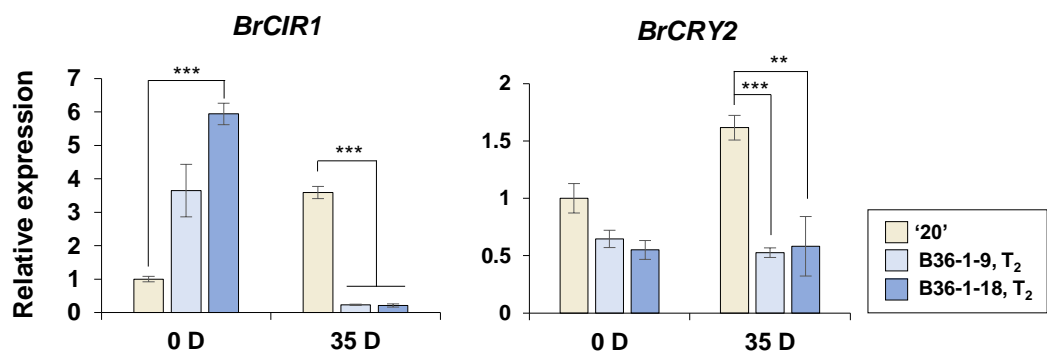

**Figure S8.** Quantitative PCR analysis in BrSOC1s-edited Chinese cabbage plants grown with or without vernalization. This analysis was done in the same leaf samples (+/- Vernalization) used for Figure 7. Gene expression after normalization based on actin (*BrACT2*) transcript abundance. The expression level of genes in '20' WT on day 0 (no Vernalization) was defined as "1". Error bars represent SE of three replicates (\*\* $p < 0.05$ , \*\*\* $p < 0.01$ ; Student's *t*-test).
